# Supplementary material for: Biosorption of Congo Red Dye from Aqueous Solution Using Adsorbent Prepared from Vangueria infausta Fruit Pericarp
Source: Hindawi journal article supplement (doi:10.1155/2023/4319053), 2023-01-01
Supplement: f1 [file 4319053.f1.docx]

Supporting Information

**Adsorption Science and Technology**

**Bio-sorption of Congo Red Dye from Aqueous Solution using Adsorbent Prepared from *Vangueria Infausta* Fruit Pericarp**

Aisha Kitemangu1, Maheswara Rao Vegi2*, Nyemaga Masanje Malima3

1,2,3Department of Chemistry, College of Natural and Mathematical Sciences, University of Dodoma, P.O. Box 259, Dodoma, Tanzania.

Correspondence should be addressed to Maheswara RaoVegi; vegi.rao@udom.ac.tz

<https://orcid.org/0000-0002-0073-7550>


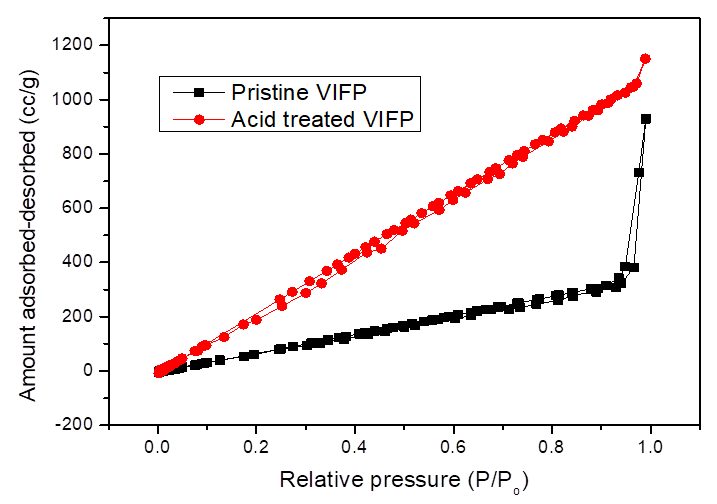


**Fig. S1:** N2 adsorption isotherm for untreated and acid treated VIFP biosorbent.

**Fig. S2:** Oxidation of C6 in cellulose by nitric acid.

Fig. S3: Proposed interactions of CR dye and the surface of VIFP biosorbent.
